# Supplementary material
Source: PubMed Central journal article supplement (PMC5982111)
Supplement: NIHMS966059-supplement.pdf [file NIHMS966059-supplement.pdf]

**Table S1, related to Star Methods (Strain and culture conditions) Bacterial Strains. Details of construction of strains can be found in full methods for strains constructed in this work, or in the respective cited reference.**

| Strain | Genotype                                                  |
|--------|-----------------------------------------------------------|
| 86-24  | Stx2A+ EHEC strain serotype O157:H7                       |
| EDL933 | Stx2A+-Stx1 EHEC strain serotype O157:H7                  |
| Sakai  | Stx2A+-Stx1 EHEC strain serotype O157:H7                  |
| JHD01  | 86-24 phage <i>N</i> antiterminator isogenic mutant       |
| JHD02  | 86-24 phage <i>Q</i> antiterminator isogenic mutant       |
| JHD03  | 86-24 phage <i>SR</i> holins isogenic double mutant       |
| JHD04  | 86-24 phage <i>cro</i> regulatory protein isogenic mutant |
| JHD05  | 86-24 <i>espA</i> translocon isogenic mutant              |
| JHD06  | 86-24 $\Delta N$ - complemented pJHD13                    |
| JHD07  | 86-24 $\Delta Q$ - complemented pJHD14                    |
| JHD08  | 86-24 $\Delta\Delta SR$ - complemented pJHD15             |
| JHD09  | 86-24 $\Delta cro$ -complemented pJHD16                   |
| JHD10  | 86-24 <i>cro</i> -pet21a in BL21                          |
| JHD11  | Sakaic <i>cro</i> -pet21a in BL21                         |
| JHD12  | EDL933 <i>cro</i> -pet21a in BL21                         |
| JHD13  | 86-24 $\Delta cro$ complemented pJHD020                   |
| JHD14  | 86-24 $\Delta cro$ complemented pJHD021                   |
| JHD15  | EDL933 phage <i>cro</i> -stx2 isogenic mutant             |
| JHD16  | EDL933 phage <i>cro</i> -stx1 isogenic mutant             |
| JHD17  | EDL933 phage <i>cro</i> -cryptic isogenic mutant          |
| JHD18  | EDL933 phage- <i>cro</i> -stx2-stx1 double mutant         |
| JHD19  | EDL933 phage- <i>cro</i> -stx2-cryptic double mutant      |
| JHD20  | EDL933 phage- <i>cro</i> -stx2-sxt1-cryptic triple mutant |
| JHD21  | Sakai phage <i>cro</i> -stx2 isogenic mutant              |
| JHD22  | Sakai phage <i>cro</i> -stx1 isogenic mutant              |
| JHD23  | Sakai phage <i>cro</i> -cryptic isogenic mutant           |
| JHD24  | Sakai phage- <i>cro</i> -stx2-stx1 double mutant          |
| JHD25  | Sakai phage- <i>cro</i> -stx2-cryptic double mutant       |

|                                                    |                                                                            |
|----------------------------------------------------|----------------------------------------------------------------------------|
| JHD26                                              | Sakai phage- <i>cro</i> - <i>stx2</i> - <i>sxt1</i> -cryptic triple mutant |
| BL21                                               | F- ompT hsdSB(rB-, mB-) gal dcm (DE3)                                      |
| TOPO10                                             | Host <i>E. coli</i> strain for protein expression                          |
| <i>E. coli</i> W3350                               | <i>galk2(Oc) galT22 IN(rrnD-rrnE)1</i>                                     |
| <i>Citrobacter rodentium</i>                       | WT murine pathogen                                                         |
| DBS100                                             |                                                                            |
| <i>Citrobacter rodentium</i> C.r-j11               | <i>C. rodentium</i> with EHEC <i>ler</i> promoter region                   |
| <i>Citrobacter rodentium</i> -C.r-j11- <i>pcro</i> | <i>C.rodentium</i> C.r-j11 complemented pJHD016                            |

**Table S2, related to Star Methods. Oligonucleotides used in this study.**

|                 | Primers used for mutagenesis and cloning                                         |
|-----------------|----------------------------------------------------------------------------------|
| N-86-24red-F    | CACCACCAAAGTTCATCAGGAGGTCTATATGACACGCAGAACTCAGTT<br>CAGTGTAGGCTGGAGCTGCTTC       |
| N-86-24red-R    | TCACCTCAAATAAGTGGTTTGTCTGCCTAATTTCAATTTCTGGCGACCAA<br>CCCATATGAATATCCTCCTT       |
| Ncomp-F         | GTTTCTGCGGCCGCATCAGGAGGTCTATATGACA clone <i>N</i><br>antiterminator in PWSK129   |
| Ncomp-R         | GTTTCTGGATCCTCATTCTGGCGACCAAC clone <i>N</i> antiterminator in<br>PWSK129        |
| Q-86-24red-F    | AAGGGAAAAGACACGCTATCGTCAACGGTGTCTTATGGTTCACCGCG<br>GATGTGTAGGCTGGAGCTGCTTC       |
| Q-86-24red-R    | TCGACTGCGTGGCAATGTAACCACTTTATCATGATATGCAGATTTTTTA<br>CGCCATATGAATATCCTCCTT       |
| Qcomp-F         | GTTTCTGCGGCCGCACGCTATCGTCAACG clone <i>Q</i> antiterminator<br>in PWSK129        |
| Qcomp-R         | GTTTCTGGATCCCATGATATGCAGATTTTTACGATC clone <i>Q</i><br>antiterminator in PWSK129 |
| SR-86-24red-F   | ACGGGGAGTCAGGGCCATCAGTAAACAGCTGCTGGCCTTTTTCATGTT<br>GTGTGTAGGCTGGAGCTGCTTC       |
| SR-86-24red-R   | TTATCTGTCGATTCCCAGCACGCCAGCGCGCTCTCCTGGTCACGACG<br>GGATCCATATGAATATCCTCCTT       |
| SR-lysis-comp-F | GTTTCTGCGGCCGCATCAGTAAACAGCTGCT clone <i>SR</i> lysis in<br>PWSK129              |
| SR-lysis-comp-R | GTTTCTGGATCCTTATCTGTCGATTCCCAGC clone <i>SR</i> lysis in<br>PWSK129              |
| Cro-86-24red-F  | TGCGGATGATTTATCAAATGGTAAAGTTGTTCTGTGTGATAAACGGAG<br>GCAGTGTAGGCTGGAGCTGCTTC      |
| Cro-86-24red-R  | TCCATTGTGAAAATAGCGGTGTTACTTATGCAGCCGATGCTCTACGCG<br>ATACCATATGAATATCCTCCTT       |
| Cro-comp-F      | GTTTCTGCGGCCGCCTGTGTGATAAACGGAGGCA clone regulatory <i>cro</i><br>in PWSK129     |
| Cro-comp-R      | GTTTCTGGATCCTCCATTGTGAAAATAGCGGTG clone regulatory <i>cro</i> in<br>PWSK129      |
| Cro-pet21a-F    | GTTTCTGGATCCATGAGTAATGAACTACTACGC clone 86-24- <i>cro</i> in<br>PET21a           |
| Cro-pet21a-R    | GTTTCTGCGGCCGCTGCAGCCGATGCTCTACG clone 86-24- <i>cro</i> in<br>PET21a            |
| CroSak-pet21F   | GTTTCTGGATCCATGAGCAACCTACGAAAATATC clone Sakai- <i>cro</i> in<br>PET21a          |
| CroSak-pet21R   | GTTTCTGCGGCCGCAGCGGCTTTGTGCTCCG clone Sakai- <i>cro</i> in<br>PET21a             |
| CroEdl-pet21F   | GTTTCTGGATCCATGCAAATCTTGATGAGCCG clone EDL933- <i>cro</i> in<br>PET21a           |
| CroEdl-pet21R   | GTTTCTGCGGCCGCTGCAGCCAGAAGTTCTTTT clone EDL933- <i>cro</i> in<br>PET21a          |
| CroSak-comF     | GTTTCTGCGGCCGCGTGGTTACTATGGAGGGCAT clone VT-Stx2- <i>cro</i> in<br>pWSK129       |
| CroSak-comR     | GTTTCTGGATCCATTAAGCGGCTTTGTGCTCC clone VT-Stx2- <i>cro</i> in<br>pWSK129         |
| CroEdl-comF     | GTTTCTGCGGCCGCTACTGAAAGTACGAAAAGGATA clone<br>BP933W- <i>cro</i> in pWSK129      |
| CroEdl-comR     | GTTTCTGGATCCATAGCGGTGTTACTTATGCAG clone BP933W- <i>cro</i> in                    |

pWSK129

|                  |                                                                              |
|------------------|------------------------------------------------------------------------------|
| EspA-86-24red-F  | TTATTTACCAAGGGATATTGCTGAAATAGTTCTATATTGTAGAGATTGC<br>GTGTAGGCTGGAGCTGCTTC    |
| EspA-86-24red-R  | ATGGATACATCAAATGCAACATCCGTTGTTAATGTGAGTGCGAGTTCTT<br>CCCATATGAATATCCTCCTT    |
| Cro-stx2edl-F    | GTAAGTAAAGTACGAAAAGGATATTCCTATGCAAAATCTTGATGAGCC<br>GTGTAGGCTGGAGCTGCTTC     |
| Cro-stx2edl-R    | CCATTGTGAAAATAGCGGTGTTACTTATGCAGCCAGAAGGTTCTTTTTG<br>CCCATATGAATATCCTCCTT    |
| Cro-stx1edl-F    | TTAGAGGTGAAAGGCCATGATGAAAGAGCGGGTACTGCTTAGGCGGC<br>TTGTGTAGGCTGGAGCTGCTTC    |
| Cro-stx1edl-R    | GGGCAATTTTGTTCATTGCGGTCTCCTTAGCATTAAATCACACACCCATT<br>ACCATATGAATATCCTCCTT   |
| Cro-crypticedl-F | GGTTGCATGTACTAAGGAGTTGTATGGAACAACGCATAACCCTGAAA<br>GGTGTAGGCTGGAGCTGCTTC     |
| Cro-crypticedl-R | TAAGAGCGGGGTTATTTATGCTGTTGTTTTTTTGTACTCGGGAAGGGC<br>TCCATATGAATATCCTCCTT     |
| Cro-stx2Sak-F    | TTCGTGGTTACTATGGAGGGCATATGAGCAACCTACGAAAATATCGAG<br>AGGTGTAGGCTGGAGCTGCTTC   |
| Cro-stx2Sak-R    | CGCTTATTAAGCGGCTTTGTGCTCCGGCGGGAACACGTCATCAAGACT<br>TACCATATGAATATCCTCCTT    |
| Cro-stx1Sak-F    | CCCAATGGATTTGCCGCTGATGTTTGTCTACCCGGTTAGAGGTGAAAG<br>GCGTGTAGGCTGGAGCTGCTTC   |
| Cro-stx1Sak-R    | GAGACCGCAATGAACAAAATTGCCAGCAGCGAAAAAAAATCGGAGTT<br>TCGCCATATGAATATCCTCCTT    |
| Cro-crypticSak-F | GGTGATAATGGTTGCATGTACTAAGGAGTTGTATGGAACAACGCATA<br>ACGTGTAGGCTGGAGCTGCTTC    |
| Cro-crypticSak-R | TGTAAGAGCGGGGTTATTTATGCTGTTGTTTTTTTGTACTCGGGAAGG<br>GCCATATGAATATCCTCCTT     |
| CroStx1edlF      | TTAGAGGTGAAAGGCCATGA                                                         |
| CroStx1edlR      | TAATGGGTGTGTGATTAATGCT                                                       |
| CrocrypdlF       | GTTGCATGTACTAAGGAGGT                                                         |
| CrocrypdlR       | TAAGAGCGGGGTTATTTATGC                                                        |
| CroStx1SakF      | CCCAATGGATTTGCCGCT                                                           |
| CroStx1SakR      | GAGACCGCAATGAACAAAATTG                                                       |
| CrocrypSakF      | GGTGATAATGGTTGCATGTACT                                                       |
| CrocrypSakR      | TGTAAGAGCGGGGTTATTTATG                                                       |
| CRlerF           | GAGCTCGGTACCCGGGGATCTTAAATGTTATTCAGAGATGTTAC                                 |
| CRlerR           | GATTAATTGTTGGTCCTTCCT                                                        |
| EHlerPF          | CCTCATGCTTTAATATTTTAAGCTA                                                    |
| EHlerPRev        | GTATAGGAACCTTCGAAGCAGCTCCAGCCTACACAGTATCATATAGCAT<br>CATATAGTGT              |
| CMf              | TGTGTAGGCTGGAGCTGCTTC                                                        |
| CMr              | ATCGGGTACGCGATCTGTTGCCCTGGAAAGTTGATCTGAGCTCTCAGT<br>AACCATATGAATATCCTCCTTAGT |
| Tris66F          | TACTGAGAGCTCAGATCAAC                                                         |
| Tris66R          | CGACCTGCAGGCATGCAAGCATGGACACCTCACTTGCTC                                      |
| FlaRzF           | TGCAAAAACAACCTGGAAGGAACCCAGAAGTATATTAATGAGCAGTGCA<br>GAGACTACAAAGACCATGACGG  |
| FlagRzR          | CGCTGGAAGCGCGGGTGTATTGCTCACAAATAATTGCATGAGTTGCCCA<br>TCCATATGAATATCCTCCTTAG  |
| RzBorF           | ATGAACCGTGTTCTGTGTGTG                                                        |
| RzBorR           | GCTGGCCCTGCTTATTACAG                                                         |

|         |                           |
|---------|---------------------------|
| LamCroF | ATGTAATAAGGAGGTTGTATG     |
| LamCroR | TGCATACACCATAGGTGTG       |
| Stx2AF  | ATGAAGTGTATATTATTTAAATGGG |
| Stx2AR  | TTTACCCGTTGTATATAAAAACTG  |

Oligonucleotides used for Real Time PCR

|            |                          |
|------------|--------------------------|
| Ler-F      | CGACCAGGTCTGCCCTTCT      |
| Ler-R      | GCGCGGAACCTCATCGAAA      |
| Tir-F      | CCATGGAGAGCAGACGTAGCT    |
| Tir-R      | CGGTGATCCTGGATTTAACCTT   |
| sepL-F     | GCCTGGGATTTCGAAAGGT      |
| sepL-R     | CTCTTGCATATCATTGAGCAGCTT |
| espA-F     | TCAGAATCGCAGCCTGAAAA     |
| espA-R     | CGAAGGATGAGGTGGTTAAGCT   |
| rpoA-F     | GCGCTCATCTTCTTCCGAAT     |
| rpoA-R     | GCGGGTGGTGGTTATGTG       |
| cro-86-24F | GTGAGGAATGGAAGCGACTC     |
| cro-86-24R | TGGTCAAGATAGCCAAGTGAAG   |
| cl-86-24F  | CGTGAGTTGAGAAGGGCTAAC    |
| cl-86-24R  | ATCGCGGGTAACACTAATGC     |
| dinIF      | GTAATGATACGTGGCCTTCA     |
| dinIR      | GAACTTTCCCGCCGATTCA      |
| fliC-F     | GTCATCCTTCGCGCTGTTAA     |
| fliC-R     | TCTGCGCTGTCGAGTTCTAT     |
| NantiF     | GTAGGGCGGTGTAATACTTC     |
| NantiR     | ATTAGCTAACGGCGTACTGG     |
| phnB-F     | CTGTCCCTGCGCTGATTTTG     |
| phnB-R     | GGCGCTGAACTGCTCTATAA     |
| proPF      | ACCGCTTGGCGGACTCTT       |
| proPR      | TCTTCTGGCGACCATATTTATC   |
| rncF       | GCTCAGAATAGAGTCGCCTA     |
| rncR       | CAGCAGGCATTAACCTCATCG    |
| trpDF      | GCGCGGTAAGCTGCCTAT       |
| trpDR      | GTAAGCTTCGACAATCGCCT     |
| wcaMF      | GTGATATTCGCCACGACAAAAG   |
| wcaMR      | GGAAGCACTTACGATAATAATTAC |
| Cr-rpoA-F  | ACGTCAGCCGGAAGTAAAGAAGA  |
| Cr-rpoA-R  | AGCGGACAGTCAATTCCAGATCGT |
| Cr-espA-F  | ACGAGGTAACAACCATGCGAGTGT |
| Cr-espA-R  | CTGCCTGGCATTGCTTTCCAGAAT |

Oligonucleotides used for EMSAS

|           |                                  |
|-----------|----------------------------------|
| Ler-173 F | CGGGATCCCGATGATTTTCTTCTATATCATTG |
| Ler-42 R  | CGGAATTCGCGACCTTATCAGGAAGGACC    |
| KanF      | CCGGAATTGCCAGCTGGGGCG            |
| KanR      | TCTTGTTCAATCATGCGAAACGATCC       |
| OrprmFv   | CGCCAGATTCGATTTGCGAAT            |
| OrprmRv   | ACTAGAAGCCTCTTTTCGCC             |

**Table S3, related to Star Methods. Plasmids.**

|         | Genotype                                                   |
|---------|------------------------------------------------------------|
| pet21a  | N-terminal His-Tag vector                                  |
| pWSK129 | pLG339 <i>ori, kan, lacZ<math>\alpha</math></i>            |
| pkd4    | $\lambda$ red template plasmid                             |
| pkd46   | $\lambda$ red recombinase expression plasmid               |
| pcp20   | TS replication and thermal induction of FLP synthesis      |
| pJHD013 | 86-24 phage <i>N</i> antiterminator in pwsk129             |
| pJHD014 | 86-24 phage <i>Q</i> - antiterminator in pwsk129           |
| pJHD015 | 86-24 phage <i>SR</i> - holins in pwsk129                  |
| pJHD016 | 86-24 phage <i>cro</i> -transcription factor in pWSK129    |
| pJHD017 | 86-24 phage <i>cro</i> -transcription factor in pet21a     |
| pJHD018 | EDL933-933w- <i>cro</i> -transcription factor in pet21a    |
| pJHD019 | Sakai-Vt-Stx2- <i>cro</i> -transcription factor in pet21a  |
| pJHD020 | EDL933-933w- <i>cro</i> -transcription factor in pWSK129   |
| pJHD021 | Sakai-Vt-Stx2- <i>cro</i> -transcription factor in pWSK129 |
| pRS551  | lacZ reporter gene fusion vector                           |

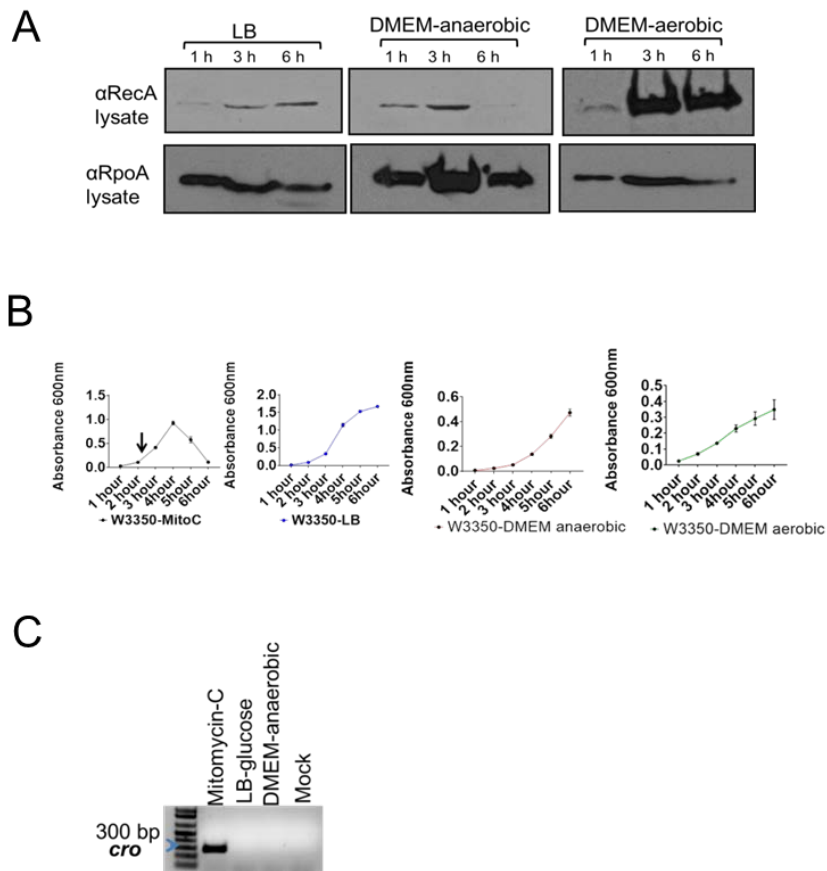

**Figure S1. Related to Figure 1. Bacteriophage activity in *E. coli* W3350.**

(A) Protein levels of the DNA repair protein, RecA, from whole-cell lysate of *E. coli* W3350 in LB aerobic, DMEM anaerobic and DMEM aerobic conditions. RpoA levels serves as a loading control (B) Growth curves of *E. coli* W3350 using LB-mitomycin C, LB-glucose, DMEM anaerobic and DMEM aerobic. The experiments were conducted with 9 biological replicates. Data are represented as mean  $\pm$  SEM. (C) Bacteriophage particles isolated from *E. coli* W3350 using PEG8000 under LB mitomycin C, LB-glucose, DMEM anaerobic and DMEM aerobic conditions, and PCR reaction was performed targeting the *cro* gene as readout.

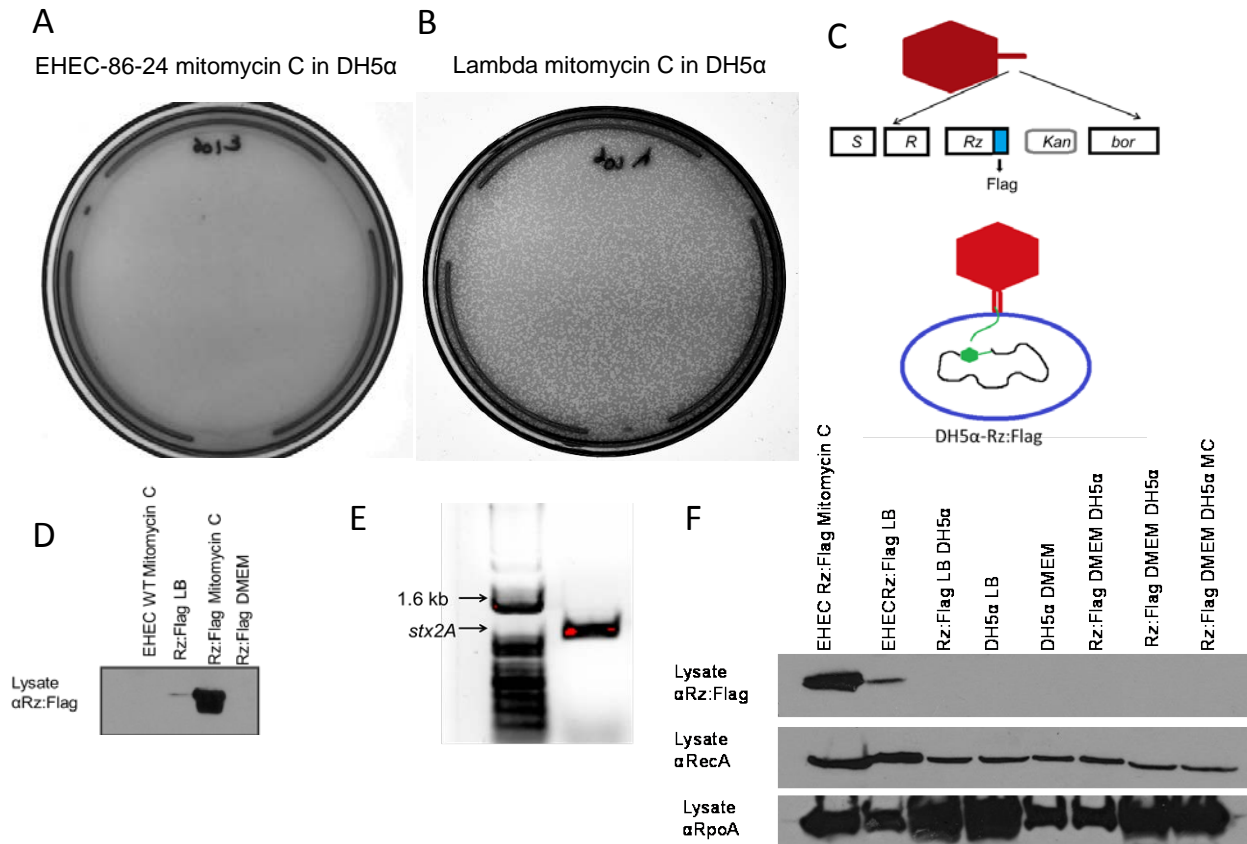

**Figure S2. Related to Figure 1. Differences between EHEC 8624 and *E. coli* W3350 bacteriophages.**

EHEC and *E. coli* W3350 were grown in LB medium and treated with Mitomycin C (10 µg/ml), centrifuged, filter sterilized and serially diluted in SM buffer and an aliquot (100 µl) was mixed with host strain *E. coli* (DH5α), incubated and poured onto LB plates to be incubated overnight. Plaques were visualized with a digital camera.

(A) EHEC Stx2 bacteriophage did not form plaques on *E. coli* DH5α.

(B) Lambda phage from strain W3350 was able to produce thousands of plaques on *E.*



*coli* DH5 $\alpha$ . (C) Cartoon depicting the strategy to Flag-tag *Rz* gene from the 8624 bacteriophage, which is a non-essential gene for bacteriophage. *Rz* is a gene located downstream of the lysis genes *SR*, and between *Rz* flag and *bor* a kanamycin resistant gene was introduced as a selection marker. (D) Western Blot experiment of EHEC 8624 *Rz*-flag strain where the bacterium was grown on different conditions, Mitomycin C, LB, and DMEM anaerobic for 6 hours to obtain whole cell lysate to be probed against anti-Flag antibody (Sigma) . WT EHEC was added to test the specificity of the Flag antibody. The Flag tag was highly expressed by the *Rz*-Flag 8624 strain in Mitomycin C. In the absence of mitomycin C it was expressed at lower levels in LB and not in DMEM. (E) PCR of DH5 $\alpha$  clone transduced with 8624 *Rz*:Flag bacteriophage depicting the presence of *stx2A* gene in the chromosome. (F) Western blot of DH5 $\alpha$  transduced with *Rz*:Flag bacteriophage under different growth conditions. The first to lines are EHEC 8624 *Rz*:flag under mitomycin C and LB conditions used as positive controls. (D) Western Blot experiment of EHEC 8624 *Rz*-flag strain where the bacterium was grown on different conditions, Mitomycin C, LB, and DMEM anaerobic for 6 hours to obtain whole cell lysate to be probed against anti-Flag antibody (Sigma) . WT EHEC was added to test the specificity of the Flag antibody. The Flag tag was highly expressed by the *Rz*-Flag 8624 strain in Mitomycin C. In the absence of mitomycin C it was expressed at lower levels in LB and not in DMEM. (E) PCR of DH5 $\alpha$  clone transduced with 8624 *Rz*:Flag bacteriophage depicting the presence of *stx2A* gene in the chromosome.

(F) Western blot of DH5 $\alpha$  transduced with Rz:Flag bacteriophage under different growth conditions. The first two lines are EHEC 8624 Rz:flag under mitomycin C and LB conditions used as positive controls.

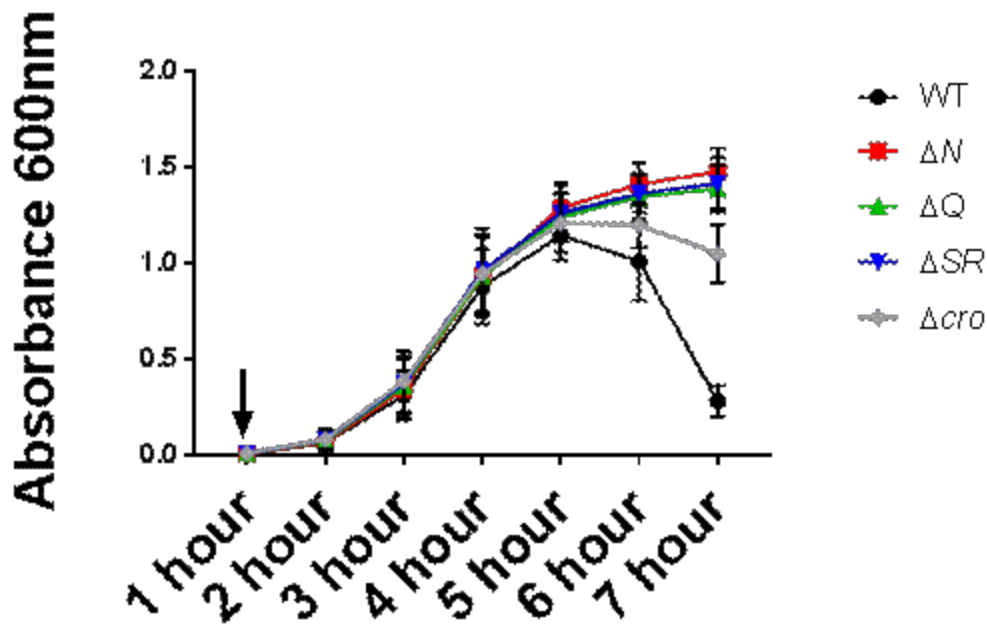

Figure S3. Related to Figures 2 and 3. EHEC 8624 bacteriophage mutants are lysogenic

Growth curves of EHEC 8624 WT (Black line) and isogenic bacteriophage mutations  $\Delta N$  (Red line),  $\Delta Q$  (Green line)  $\Delta SR$  (Blue line) and  $\Delta cro$  (Grey line). The strains were grown in LB medium supplemented with a low concentration of Mitomycin C (200 ng/ml) under aerobic conditions, and induction was done at the beginning of the experiment (0 hour) (n=3, error bars, standard deviation).

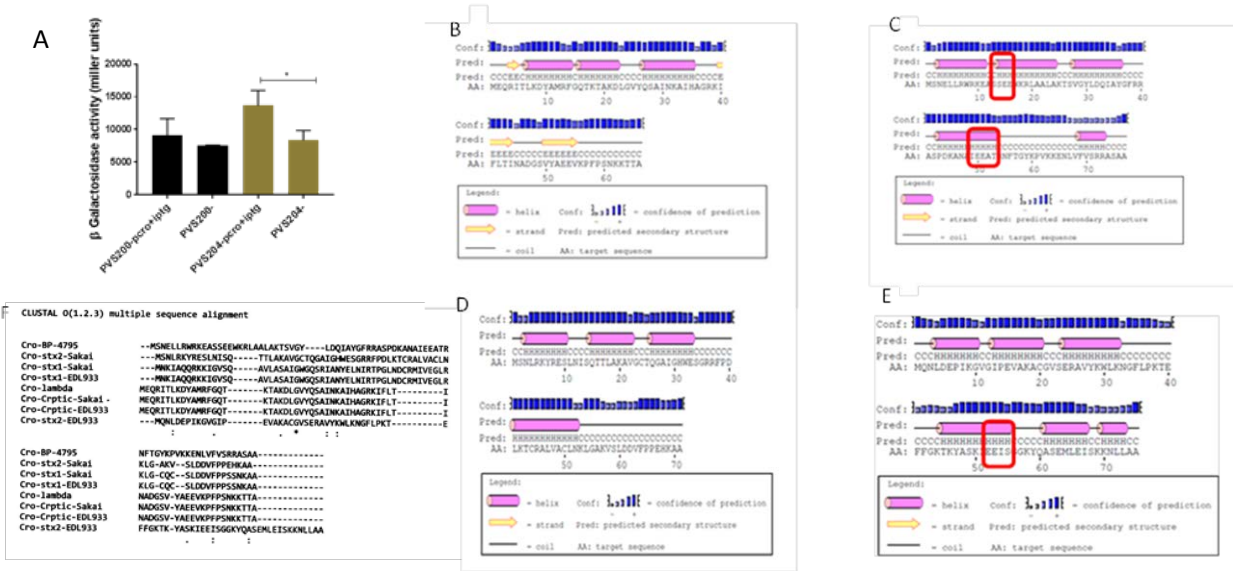

**Figure S4. Related to Figure 4. Cro regulation of ler and Different Cro proteins.**

(A) Beta galactosidase assay of *ler-lacZ* fusions in *E. coli* K-12 MC4100 in the absence (vector control) or presence of pCro. IPTG is used in all cultures because it induces *cro* expression. Cultures were grown in DMEM. pVS204 contains the -343 to +86 regulatory region of *ler*. pVS200 does not contain *ler* P2 promoter (Sharp and Sperandio, 2007) . P<0.05 as significant. (B) The presence of acidic patches in the DNA domain of a transcription factor are required for transcriptional activation(Bushman and Ptashne, 1988; Ko et al., 2008). Cro proteins from the different phages were evaluated using the software Protein Sequence Analysis Workbench (PSPIRED)(Buchan et al., 2013). a, Lambda ( $\lambda$ ) Cro protein, accession number NP\_040629.1 was used for comparison purposes showing the software's accuracy to predict the Cro DNA binding domain at amino acid residual 30 , QSANK showed as pink bars. Noticeably, this domain does not contain acidic patches which is typical for this type of Cro. (C) EHEC 86-24 Cro

accession number YP\_001449261.1 contains two domains , at residuals 20 and 50 which have acidic patches SEE and EE-T respectively (red boxes). (D) EHEC Sakai VT-Stx2 Cro accession number WP\_000067727, does not have any residual patches in the predicted helix domains. (E) EHEC EDL933 933W Cro accession number NP\_286964, contain one domain at residual 50 with acid patch EE-S (red box). (F) Clustal Omega alignments of all the Cro used in the study. Phage BP-4795 Cro is 100 percent identical to EHEC strain 86-24 phage Cro. EHEC strain EDL933 contain three different phages: Shiga toxin 2 (Stx2) phage ( $\Phi$ BP933W ), Shiga toxin 1 (Stx1) phage ( $\Phi$ CP933V) and Cryptic phage. EHEC strain Sakai contain also three different phages: Shiga toxin 2 (Stx2) phage ( $\Phi$ VTX2), Shiga toxin 1 (Stx1) phage ( $\Phi$ ECs2989), and Cryptic phage ( $\Phi$  ECs0275). Lambda phage Cro was added for comparison purposes. Cro accession numbers used in the alignment were : YP\_001449261.1, NP\_040629.1, WP\_000067727, NP\_286964.1 , WP\_000437875, WP\_000437875.1, WP\_001033078.1. (E) EHEC EDL933 933W Cro accession number NP\_286964, contain one domain at residual 50 with acid patch EE-S (red box). (F) Clustal Omega alignments of all the Cro used in the study. Phage BP-4795 Cro is 100 percent identical to EHEC strain 86-24 phage Cro. EHEC strain EDL933 contain three different phages: Shiga toxin 2 (Stx2) phage ( $\Phi$ BP933W ), Shiga toxin 1 (Stx1) phage ( $\Phi$ CP933V) and Cryptic phage. EHEC strain Sakai contain also three different phages: Shiga toxin 2 (Stx2) phage ( $\Phi$ VTX2), Shiga toxin 1 (Stx1) phage ( $\Phi$ ECs2989), and Cryptic phage ( $\Phi$  ECs0275). Lambda phage Cro was added for comparison purposes. Cro accession numbers used in the alignment were : YP\_001449261.1, NP\_040629.1,

WP\_000067727, NP\_286964.1 , WP\_000437875, WP\_000437875.1,  
WP\_001033078.1.

**A** Down regulated genes affected by  $\Delta cro$

| Virulence | Dna-repair | Peptidoglycan-cell-wall | Metabolism | Hypothetical-protein | tRNA-rRNA | Phage-related | Transport | Total |
|-----------|------------|-------------------------|------------|----------------------|-----------|---------------|-----------|-------|
| 49        | 52         | 30                      | 181        | 87                   | 81        | 42            | 62        | 584   |

**B** Up-regulated genes affected by  $\Delta cro$

| Virulence | Dna-repair | Peptidoglycan-cell-wall | Metabolism | Hypothetical-protein | tRNA-rRNA | Phage-related | Transport | Total |
|-----------|------------|-------------------------|------------|----------------------|-----------|---------------|-----------|-------|
| 9         | 40         | 23                      | 84         | 64                   | 44        | 15            | 28        | 307   |

**C** TypeIII-Secretion system Down regulated genes in  $\Delta cro$ .

| Gene name    | Fold Change | Biological function                                                                         |
|--------------|-------------|---------------------------------------------------------------------------------------------|
| <i>espA</i>  | 0.061       | protein EspA                                                                                |
| <i>espD</i>  | 0.081       | protein EspD                                                                                |
| <i>Z5111</i> | 0.105       | Tir chaperone protein (CesT) family                                                         |
| <i>Z3071</i> | 0.119       | secretion protein EspJ                                                                      |
| <i>Z5104</i> | 0.122       | pathogenicity island 2 effector protein SseE                                                |
| <i>espF</i>  | 0.179       | secretion protein EspF                                                                      |
| <i>espB</i>  | 0.247       | Enterobacterial EspB protein                                                                |
| <i>Z3921</i> | 0.249       | T3SS effector protein NleG8                                                                 |
| <i>Z5102</i> | 0.297       | EscG/YscG/SsaH family type III secretion system                                             |
| <i>Z5125</i> | 0.329       | type III secretion system protein SepD                                                      |
| <i>sepZ</i>  | 0.338       | type III secretion system protein SepZ                                                      |
| <i>Z5121</i> | 0.359       | Hypothetical protein (type III secretion)                                                   |
| <i>Z5116</i> | 0.365       | type III secretion system protein SepQ                                                      |
| <i>Z5114</i> | 0.408       | regulation of protein secretion, Tir chaperone protein (CesT) family (hypothetical protein) |
| <i>Z1829</i> | 0.478       | type III secretion protein GogB                                                             |

**D**

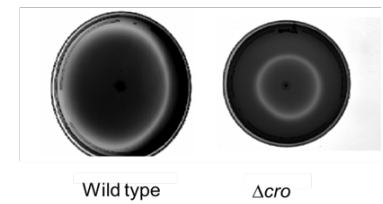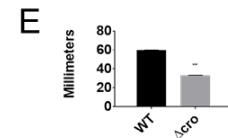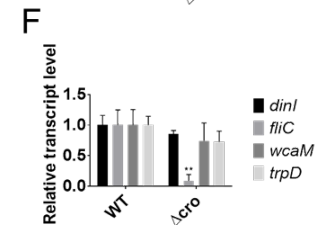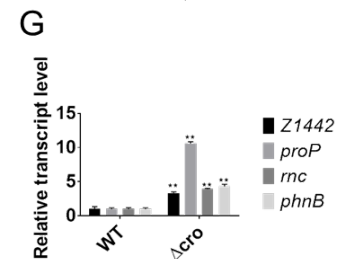

**Figure S5. Related to Figures 1-4. Microarray analysis of EHEC 8624  $\Delta cro$  grown**

**anaerobically in DMEM.** (A-B). Transcriptomic profile of a mutation in the bacteriophage transcription factor, *cro*, where approximately 800 genes were affected and grouped in categories. Majority of the affected genes were down regulated in  $\Delta cro$  (approximately 500) and the remaining genes were up regulated in  $\Delta cro$  (300).

(C) Summary of genes affected (down regulated) in the T3SS comprising genes related to the needle apparatus such as *espA*, and secreted encoded effectors like *espF*.

(D) Motility plates were conducted using a low concentration of agar (0.25%) in DMEM anaerobically at 37°C overnight. Wild type EHEC 86-24 and isogenic  $\Delta cro$  were grown

in LB medium overnight, plates were stabbed in the middle with the respective strain and incubated anaerobically overnight.

(E) Motility experiments were conducted in triplicates at three independent times having a total of 9 replicates, the diameter was measured and a Student's *t*-test was conducted showing statistical significance at  $p < 0.01$  (\*\*). qRT-PCR of selected genes from the microarray experiments. RNA was extracted from EHEC 86-24 strains grown anaerobically in DMEM to an OD<sub>600</sub> of 0.6 (n=6 replicates per strain; asterisks,  $p < 0.01$ ; Student's *t*-test).

(F) Up-regulated genes and

(G) Down regulated genes affected by  $\Delta$ *cro* compared to wild type (WT) EHEC.



A

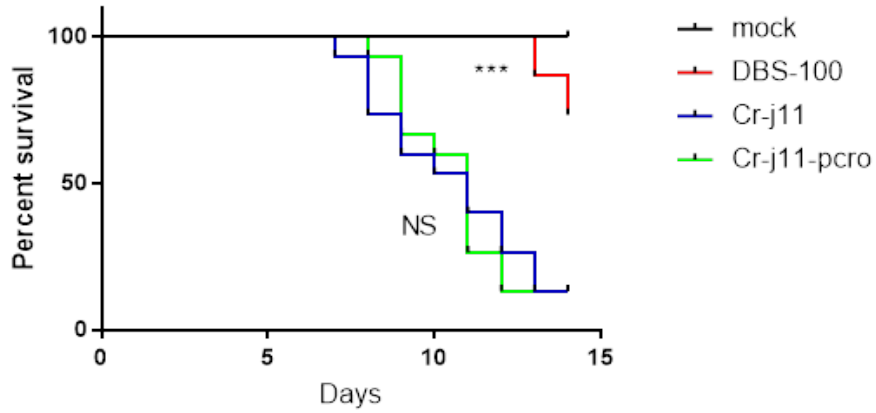

B

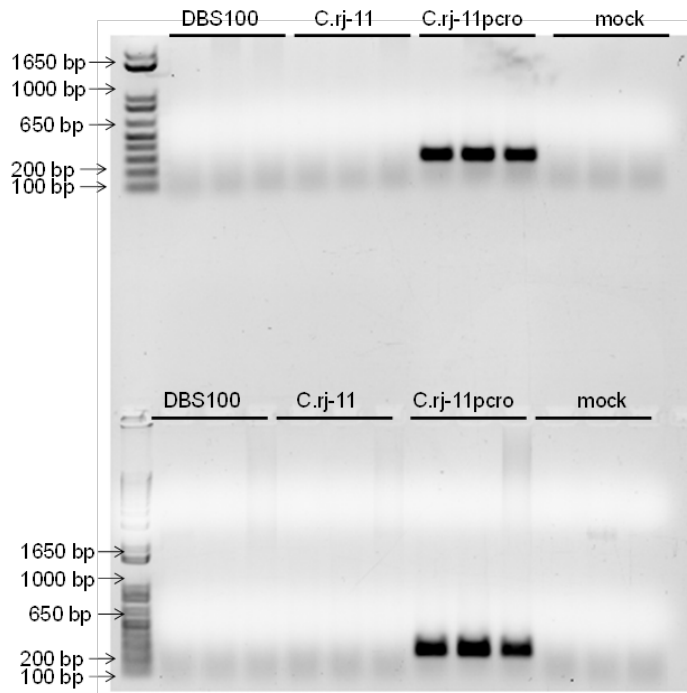

**Figure S6. Related to Figures 5 and 6. The disease prognosis in mice can be influenced utilizing the EHEC 8624 bacteriophage Cro expressed in Trans**

(A) Survival curves of mouse after infection with mock (PBS) and different *C. rodentium*

strains. The curves show a drastically difference between *Cr-j11*, *Cr-j11-pcro* and *C. rodentium* DBS100. There was a highly statistical significance comparing DBS100 either *Cr-j11* or *Cr-j11-pcro* (\*\* $p < 0.01$ ). Nonetheless, there was not statistical significance within *Cr-j11* and *Cr-j11-pcro* (n=15, analysis was done using Mantel-cox, and Grehan-Breslow-Wilcoxon tests in GraphPad prism). (B) 8624 *cro* phage gene isolated from mouse distal colon. The RNA from distal colon was extracted and cDNA converted . PCR reaction was conducted using primers to target the *cro* gene complemented in trans into pwsk129 plasmid. Each lane denotes a single mouse from different groups.
